# Supplementary material
Source: Springer Nature journal article supplement (https://www.springermedizin.de/resource/supplementary/12881_2012_997_MOESM3_ESM.pdf/9451768)

KvDMR

H19

me un  
mat pat

un me  
pat mat

control  
leukocyte

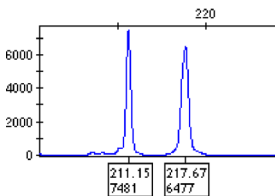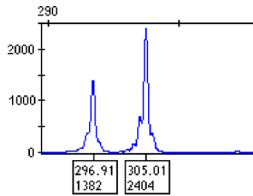

proband  
leukocyte

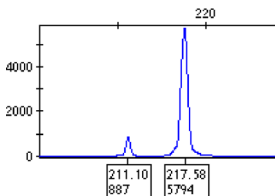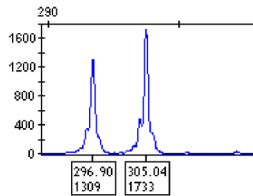

proband  
buccal

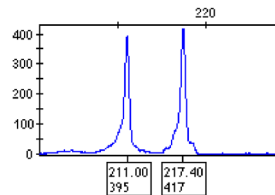

Supplement: MOESM3 [file 9451768]
